# Supplementary material
Source: Springer Nature journal article supplement (https://www.springermedizin.de/resource/supplementary/12958_2012_990_MOESM4_ESM.pdf/9566516)

# Relative Luciferase Activities

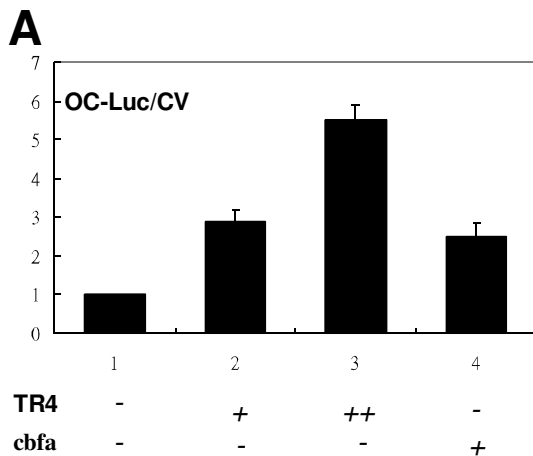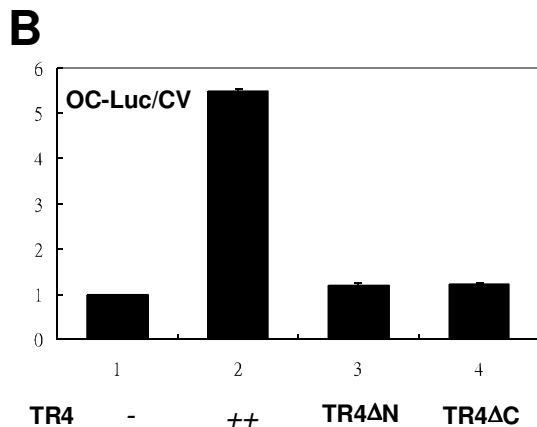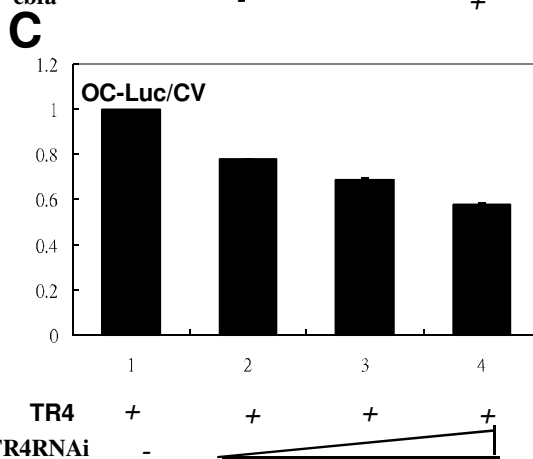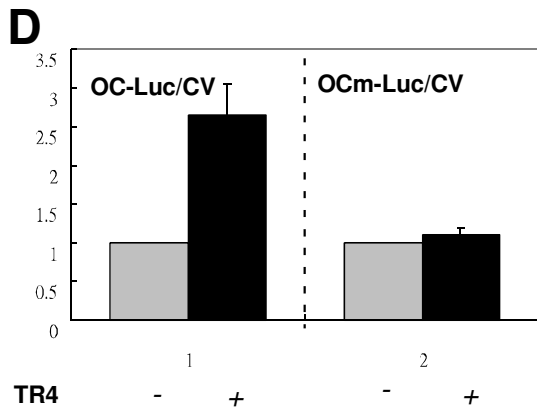

Supplement: MOESM4 [file 9566516]
